# Supplementary material for: Study protocol: Cost effectiveness of two strategies to implement the NVOG guidelines on hypertension in pregnancy: An innovative strategy including a computerised decision support system compared to a common strategy of professional audit and feedback, a randomized controlled trial
Source: Springer Nature journal article supplement (doi:10.1186/1748-5908-5-68), 2010-09-06
Supplement: 13012_2010_282_MOESM1_ESM.pdf [file 13012_2010_282_MOESM1_ESM.pdf]

Cluster randomisation of participating hospitals  
N = 20

*BOS supported strategy*  
Participating hospitals  
N = 10

*BOS supported strategy*  
Inclusion of eligible women  
willing to participate  
N = 236

*BOS supported strategy*  
15% drop-out or lost to follow-up  
N = 36

*BOS supported strategy*  
Primary outcome measures:  
major maternal complications  
N = 200

*Common strategy*  
Participating hospitals  
N = 10

*Common strategy*  
Inclusion of eligible women  
willing to participate  
N = 236

*Common strategy*  
15% drop-out or lost to follow-up  
N = 36

*Common strategy*  
Primary outcome measures:  
major maternal complications  
N = 200
